# Supplementary material for: HIV-1 intron-containing RNA expression induces innate immune activation and T cell dysfunction
Source: PubMed Central journal article supplement (PMC6110775; doi:10.1038/s41467-018-05899-7), 2018-08-27
Supplement: 41467_2018_5899_MOESM1_ESM.pdf [file 41467_2018_5899_MOESM1_ESM.pdf]

**Supplementary Information**

**HIV-1 Intron-containing RNA Expression Induces Innate Immune  
Activation and T Cell Dysfunction**

Akiyama et al.

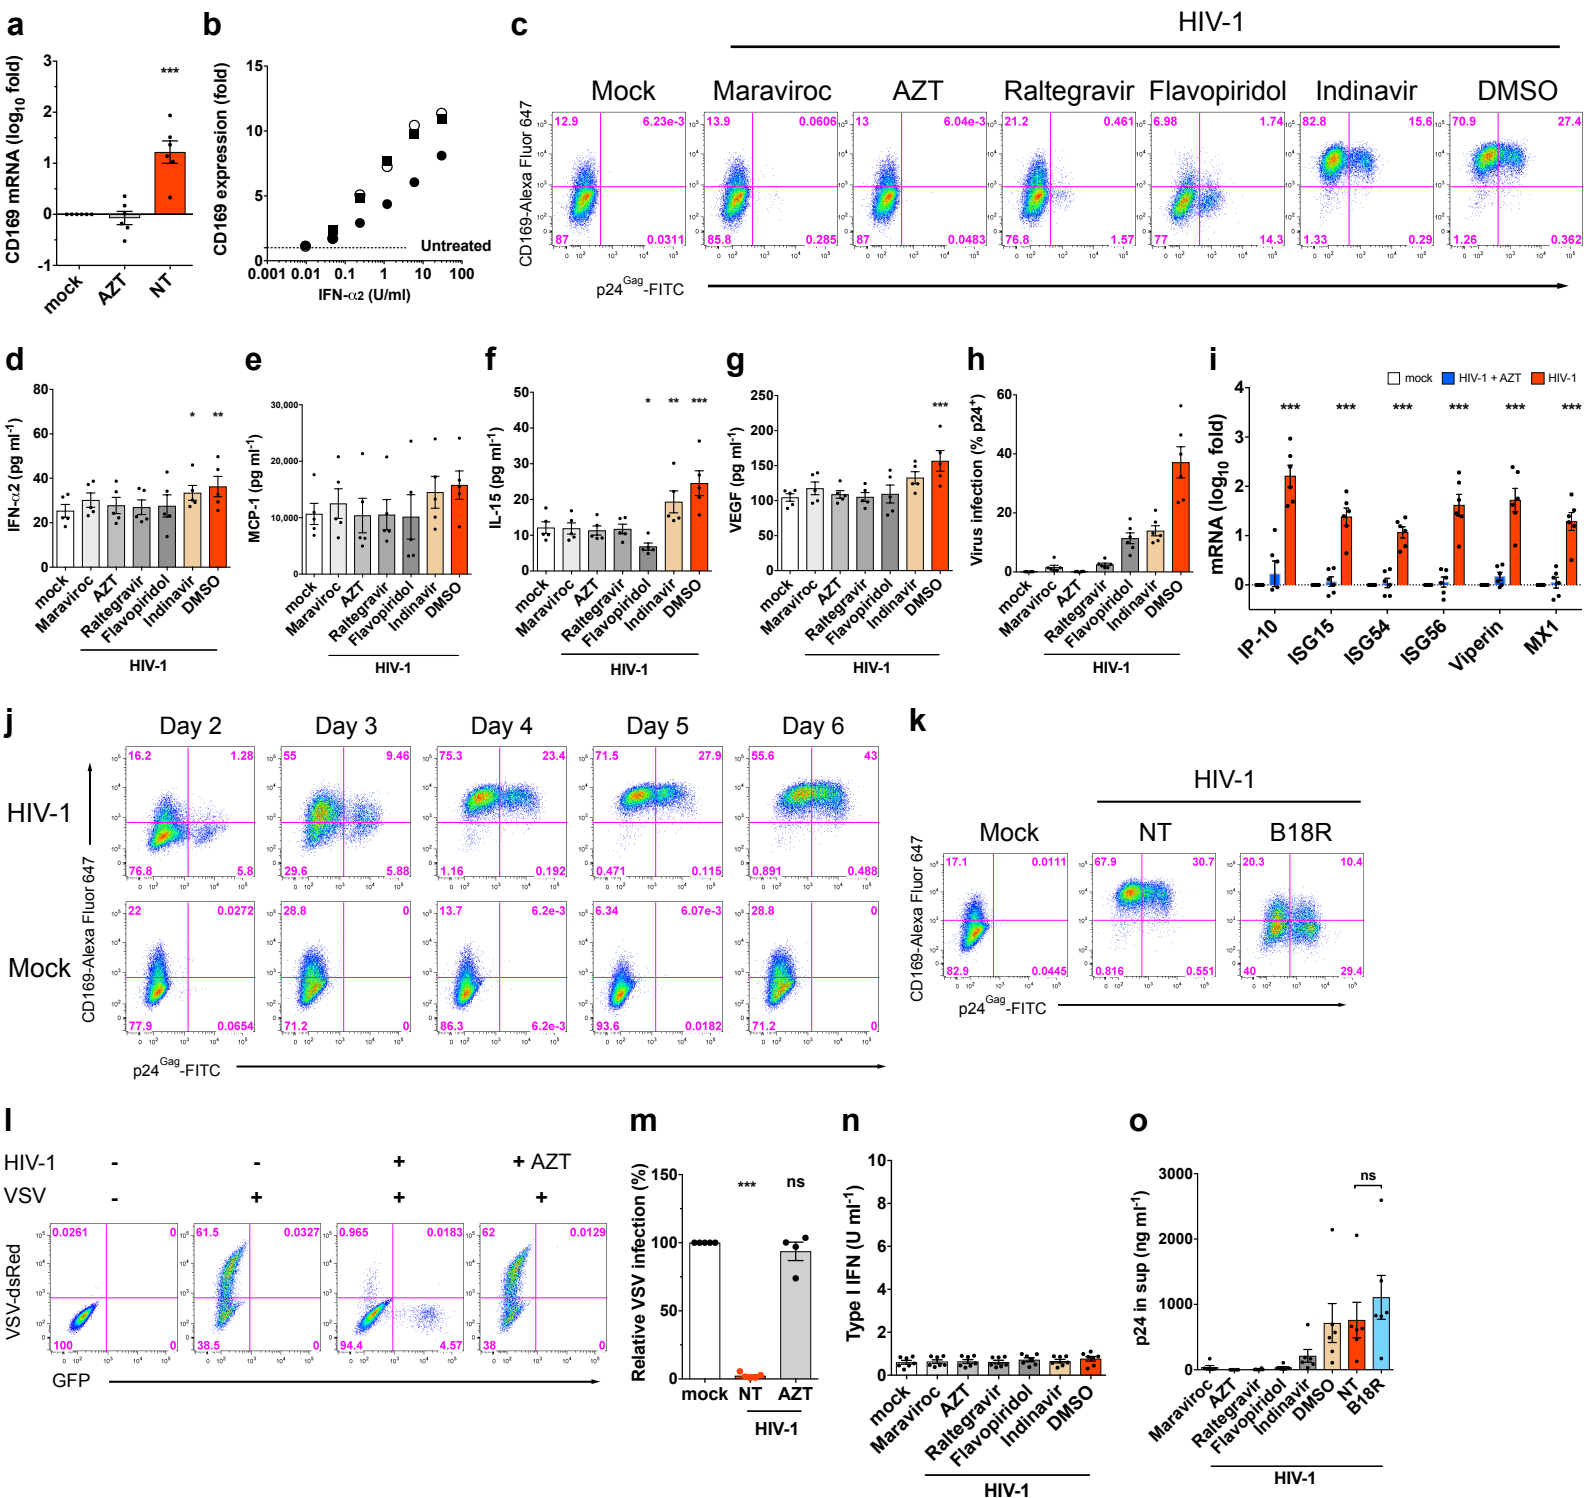

**Supplementary Figure 1. Late step of HIV-1 replication in MDMs triggers immune activation.**

**a**, MDMs were infected with Lai $\Delta$ envGFP/G (MOI 2) and harvested for mRNA isolation 3 days post infection (dpi). CD169 mRNA was quantified by qRT-PCR and normalized to that of mock. **b**, MDMs were incubated with the indicated amounts of IFN- $\alpha_2$  for 2 days, and CD169 expression was measured by flow cytometry. **c**, Representative flow cytometry profiles of MDMs infected with Lai/YU-2env (MOI 1) and analyzed for viral infection (intracellular p24<sup>Gag</sup>) and CD169 expression 6 dpi. MDMs were untreated (DMSO) or treated with drugs prior to infection (maraviroc, AZT or raltegravir), or 2-3 hours post infection (flavopiridol or indinavir). **d-g**, Cytokine production in HIV-1-infected MDMs was measured by Luminex (6 dpi). **h**, HIV-1 infection in MDMs was measured by intracellular p24<sup>Gag</sup> staining. **i**, ISG expression in MDMs infected with Lai $\Delta$ envGFP/G (MOI 2) was quantified by qRT-PCR and normalized to that of mock (3 dpi). **j**, Kinetics of CD169 expression. Uninfected MDMs and MDMs infected with Lai/YU-2env (MOI 1) were analyzed 2 to 6 dpi for CD169 and HIV-1 infection (intracellular p24<sup>Gag</sup>). Representative flow cytometry profiles are shown. **k**, Representative flow cytometry profiles of MDMs infected with Lai/YU-2env (MOI 1) in the presence of B18R (6 dpi). **l**, VSV infection in HIV-1-infected MDMs. MDMs were uninfected (mock) or infected with HIV-1 (GFP in place of *nef*) in the absence (NT) or presence of AZT for 6 days, and further infected with VSV-dsRed for 16 hours. **m**, The percentage of VSV infection was normalized to that of mock. **n**, IFN-I secretion from HIV-1-infected MDMs (6 dpi) was measured by a bioassay. **o**, Virus production (p24<sup>Gag</sup>) in HIV-1-infected MDMs culture supernatants was measured by ELISA (6 dpi). The data shown are the means  $\pm$  SEM and each symbol represents data obtained from cells derived from an independent donor. Two-tailed p values were calculated using one-way ANOVA followed by the Dunnett's post-test (**a**, **d-h** and **m**) or the Tukey-Kramer post-test (**o**). \*:  $p < 0.05$ , \*\*:  $p < 0.01$ , \*\*\*:  $p < 0.001$ , ns: not significant.

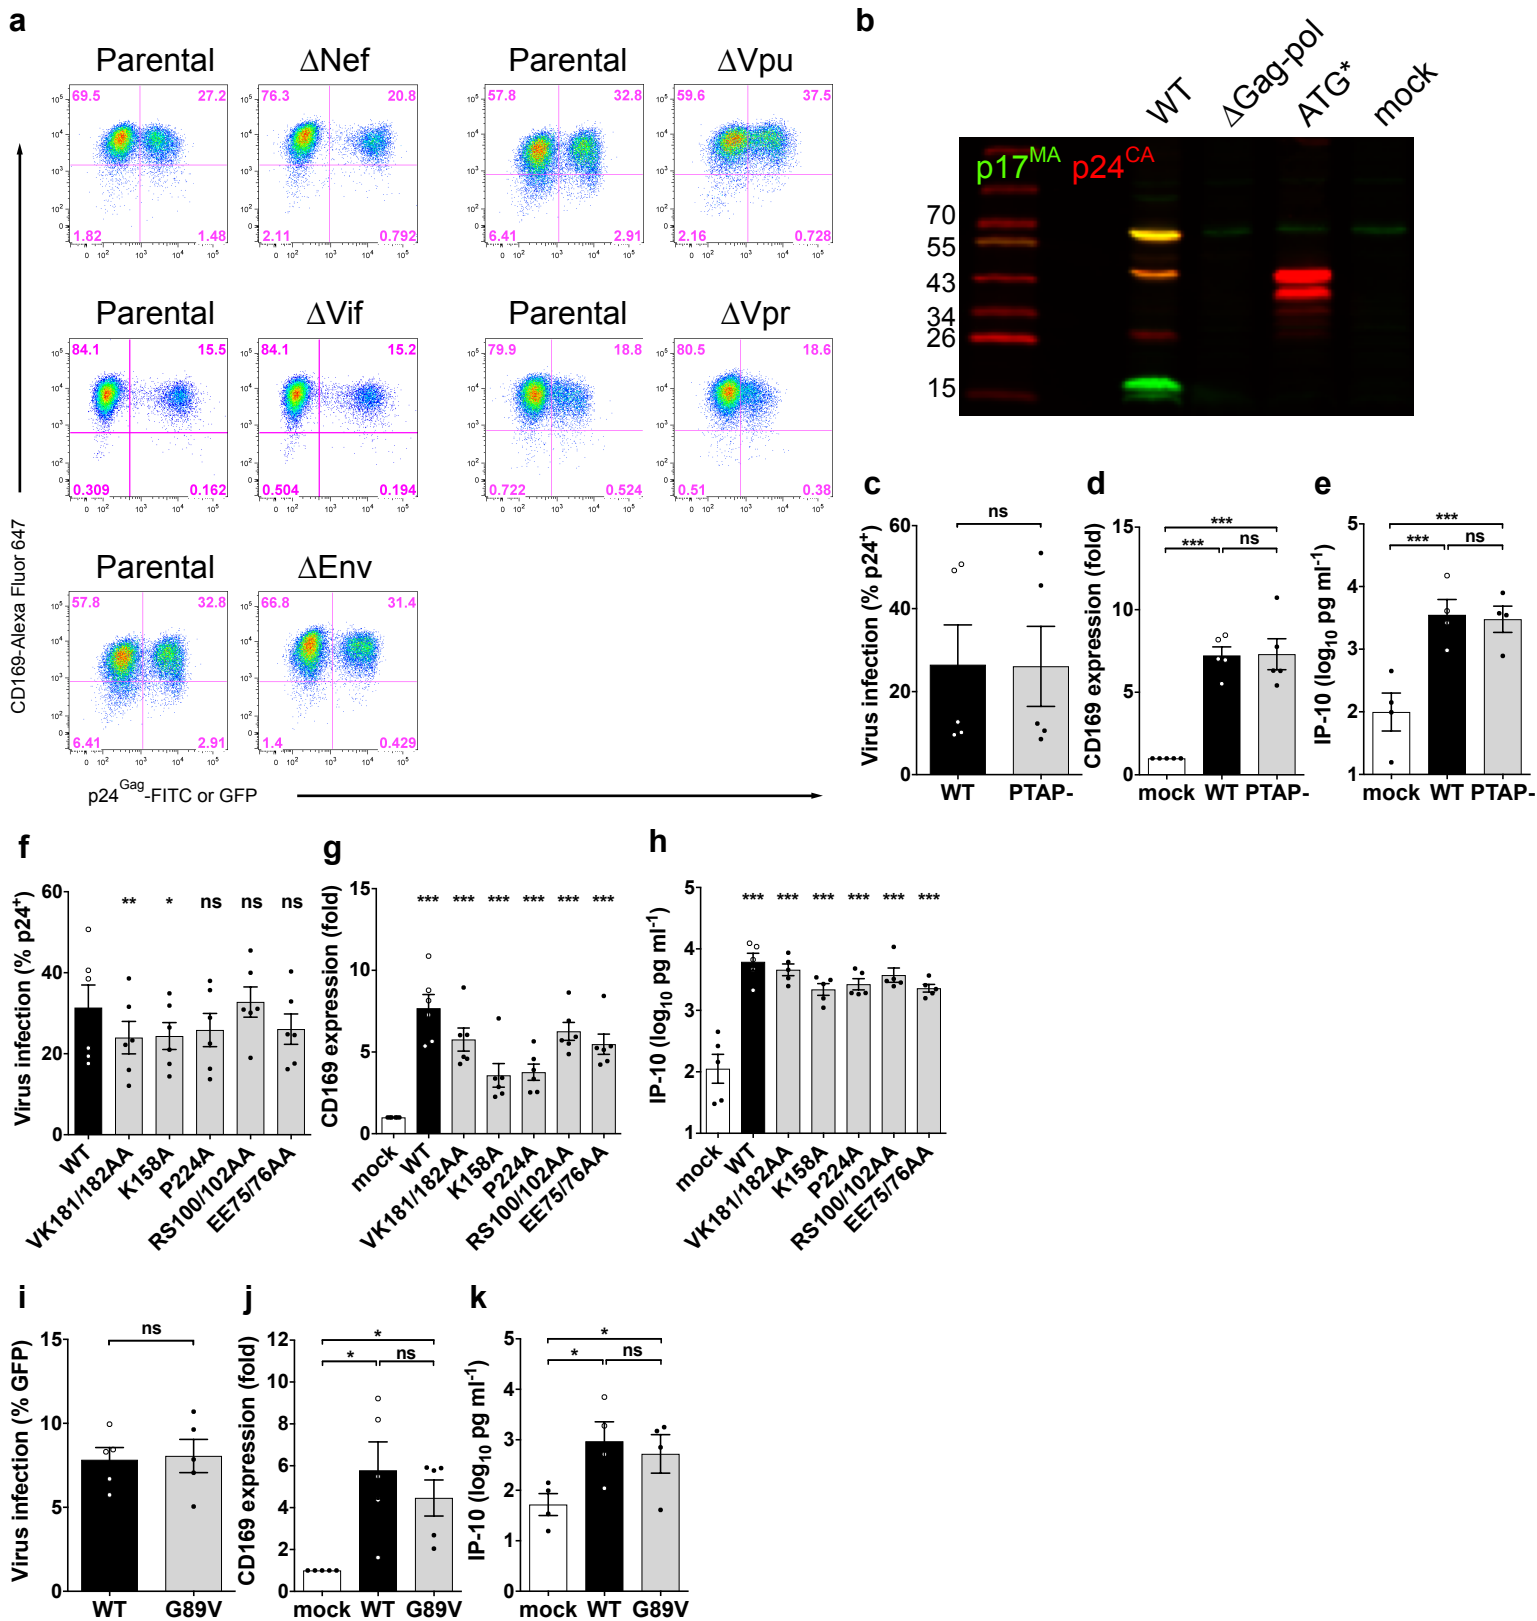

**Supplementary Figure 2. Structural and accessory proteins of HIV-1 do not encode immune-activation determinants.**

**a**, Representative flow cytometry profiles of MDMs infected with HIV-1 mutants and their parental clones at MOI of 1 and analyzed on 6 days post infection for CD169 and viral infection (intracellular p24<sup>Gag</sup> staining or GFP expression) (6 dpi). **b**, Western blot analysis for MA (p17) and CA (p24) expression in HEK293T cells transfected with Lai $\Delta$ envGFP (WT),  $\Delta$ Gag-pol mutant, or ATG\* mutant. **c-e**, HIV-1 expression (intracellular p24<sup>Gag</sup>) (**c**), CD169 expression (**d**), and IP-10 production (**e**) in MDMs transduced with the wild type (WT) or PTAP- mutant (6 dpi). **f-h**, HIV-1 expression (intracellular p24<sup>Gag</sup>) (**f**), CD169 expression (**g**), and IP-10 production (**h**) in MDMs transduced with the wild type (WT) or indicated CA mutants deficient for intra- or inter-hexamer formation (6 dpi). **i-k**, HIV-1 expression (GFP) (**i**), CD169 expression (**j**), and IP-10 production (**k**) in MDMs transduced with the wild type (WT) or CyPA-binding-deficient mutant (G89V) (6 dpi). The data shown are the means  $\pm$  SEM and each symbol represents data obtained from cells derived from an independent donor. Two-tailed p values were calculated using one-way ANOVA followed by the Tukey-Kramer post-test (**d, e, j, k**) or the Dunnett's post-test (**f, g, h**), or a paired t-test (**c, i**). \*:  $p < 0.05$ , \*\*:  $p < 0.01$ , \*\*\*:  $p < 0.001$ , ns: not significant.

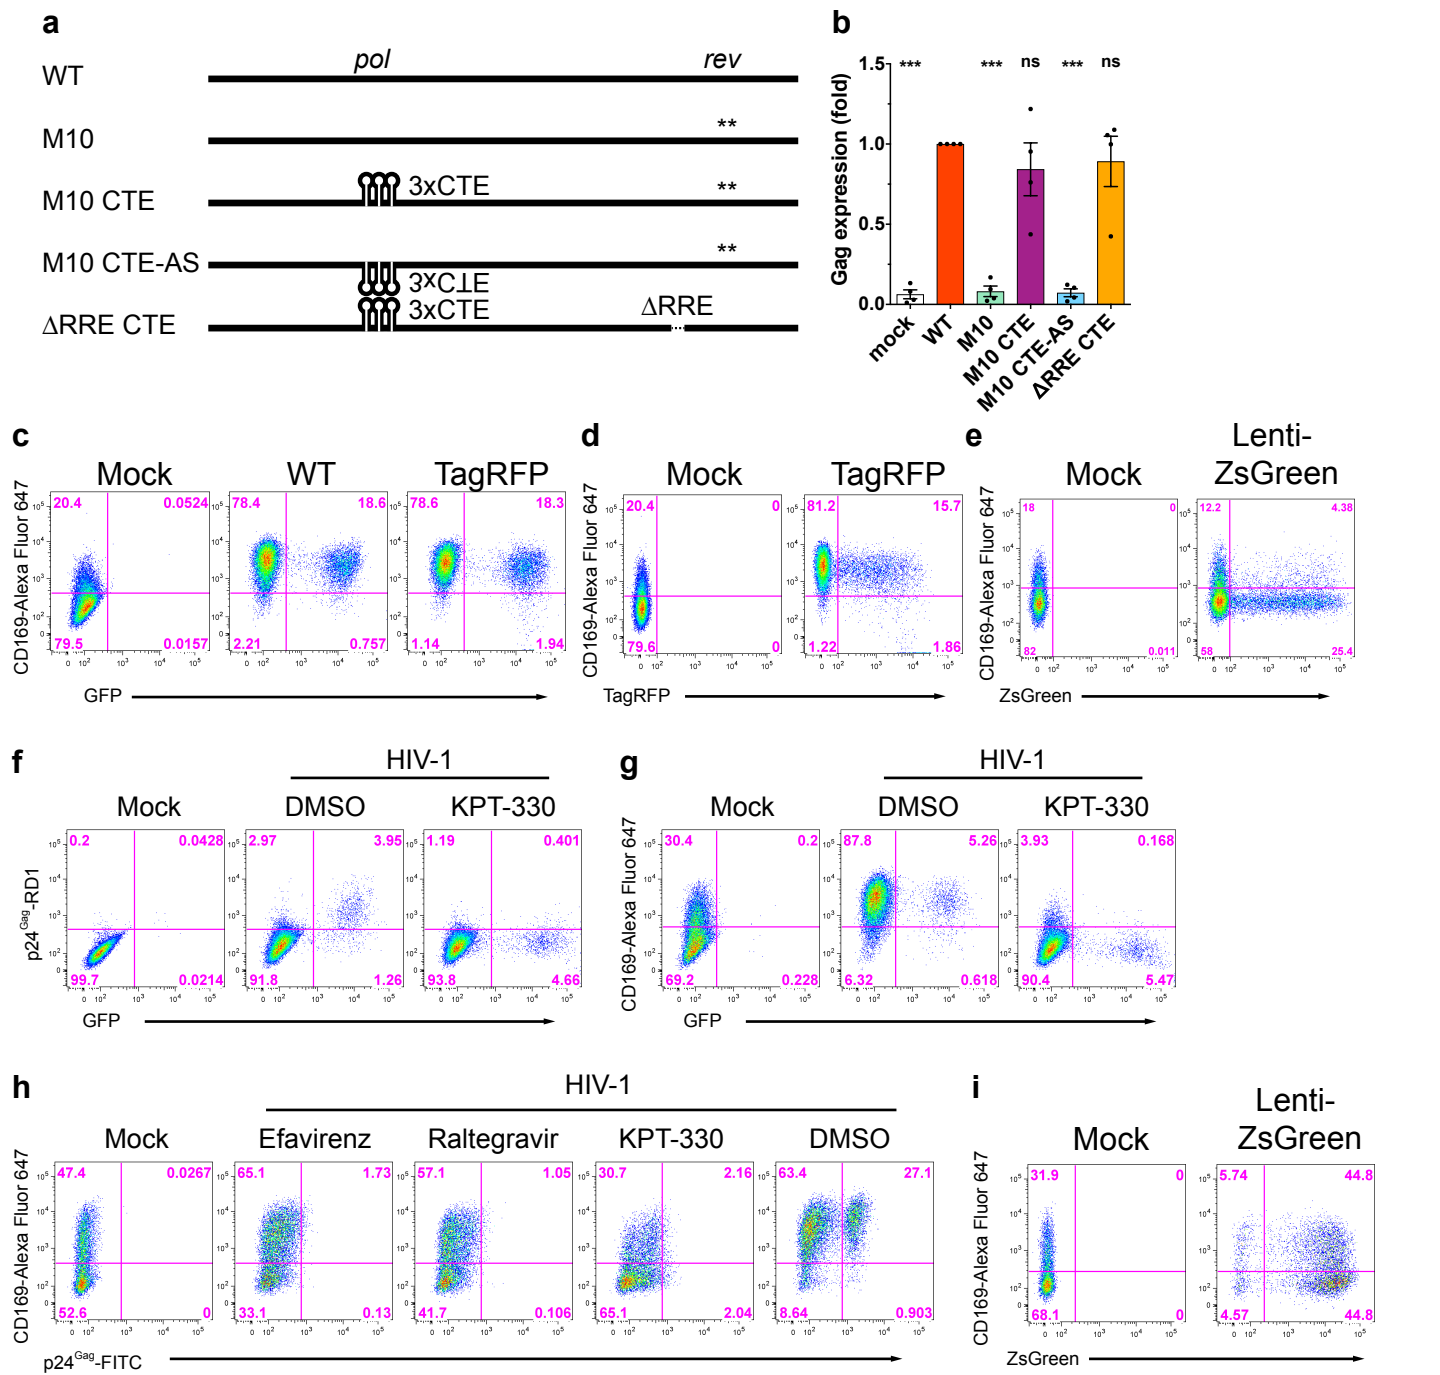

**Supplementary Figure 3. Rev-CRM1 dependent HIV-1 icRNA export is important for sensing.**

**a**, Schematic demonstration of HIV-1 mutants. \*: position of mutation, CTE: constitutive transport element, RRE: Rev responsive element. **b**, Gag expression in infected MDMs with WT and Rev mutants (**Fig. 3a**) was quantitated and normalized to WT infection. Two-tailed p values were calculated using one-way ANOVA followed by the Dunnett's post-test to WT. \*\*\*:  $p < 0.001$ , ns: not significant. **c**, **d**, Representative flow cytometry profiles of MDMs transduced with the TagRFP mutant showing CD169 expression and GFP (in place of *nef*) (**c**) or TagRFP expression (in place of MA) (**d**) (6 dpi). **e**, Representative flow cytometry profiles of MDMs transduced with a lentiviral vector expressing ZsGreen driven by the human EF-1 $\alpha$  promoter (6 dpi). **f**, Representative flow cytometry profiles of MDMs infected with HIV-1 in the absence (DMSO) or presence of CRM1 inhibitor KPT-330. KPT-330 inhibited p24<sup>Gag</sup> expression from unspliced RNA but did not inhibit GFP expression (in place of *nef*) from multiply spliced RNA (6 dpi). **g**, Representative flow cytometry profiles of MDMs infected with HIV-1 in the absence (DMSO) or presence of CRM1 inhibitor KPT-330 showing CD169 expression and viral infection (GFP) (6 dpi). **h**, Representative flow cytometry profiles of MDMs infected with HIV-1 in the absence (DMSO) or presence of CRM1 inhibitor KPT-330 showing CD169 expression and viral infection (GFP) (6 dpi). **i**, Representative flow cytometry profiles of MDDCs infected with HIV-1 in the absence (DMSO) or presence of HIV-1 inhibitors (EFZ: efavirenz, Ral: raltegravir) or CRM1 inhibitor KPT-330. MDMs were stained for CD169 and intracellular p24<sup>Gag</sup> on day 3 post infection. **j**, Representative flow cytometry profiles of MDDCs infected with a lentiviral vector expressing ZsGreen and stained for CD169 on day 3 post infection.

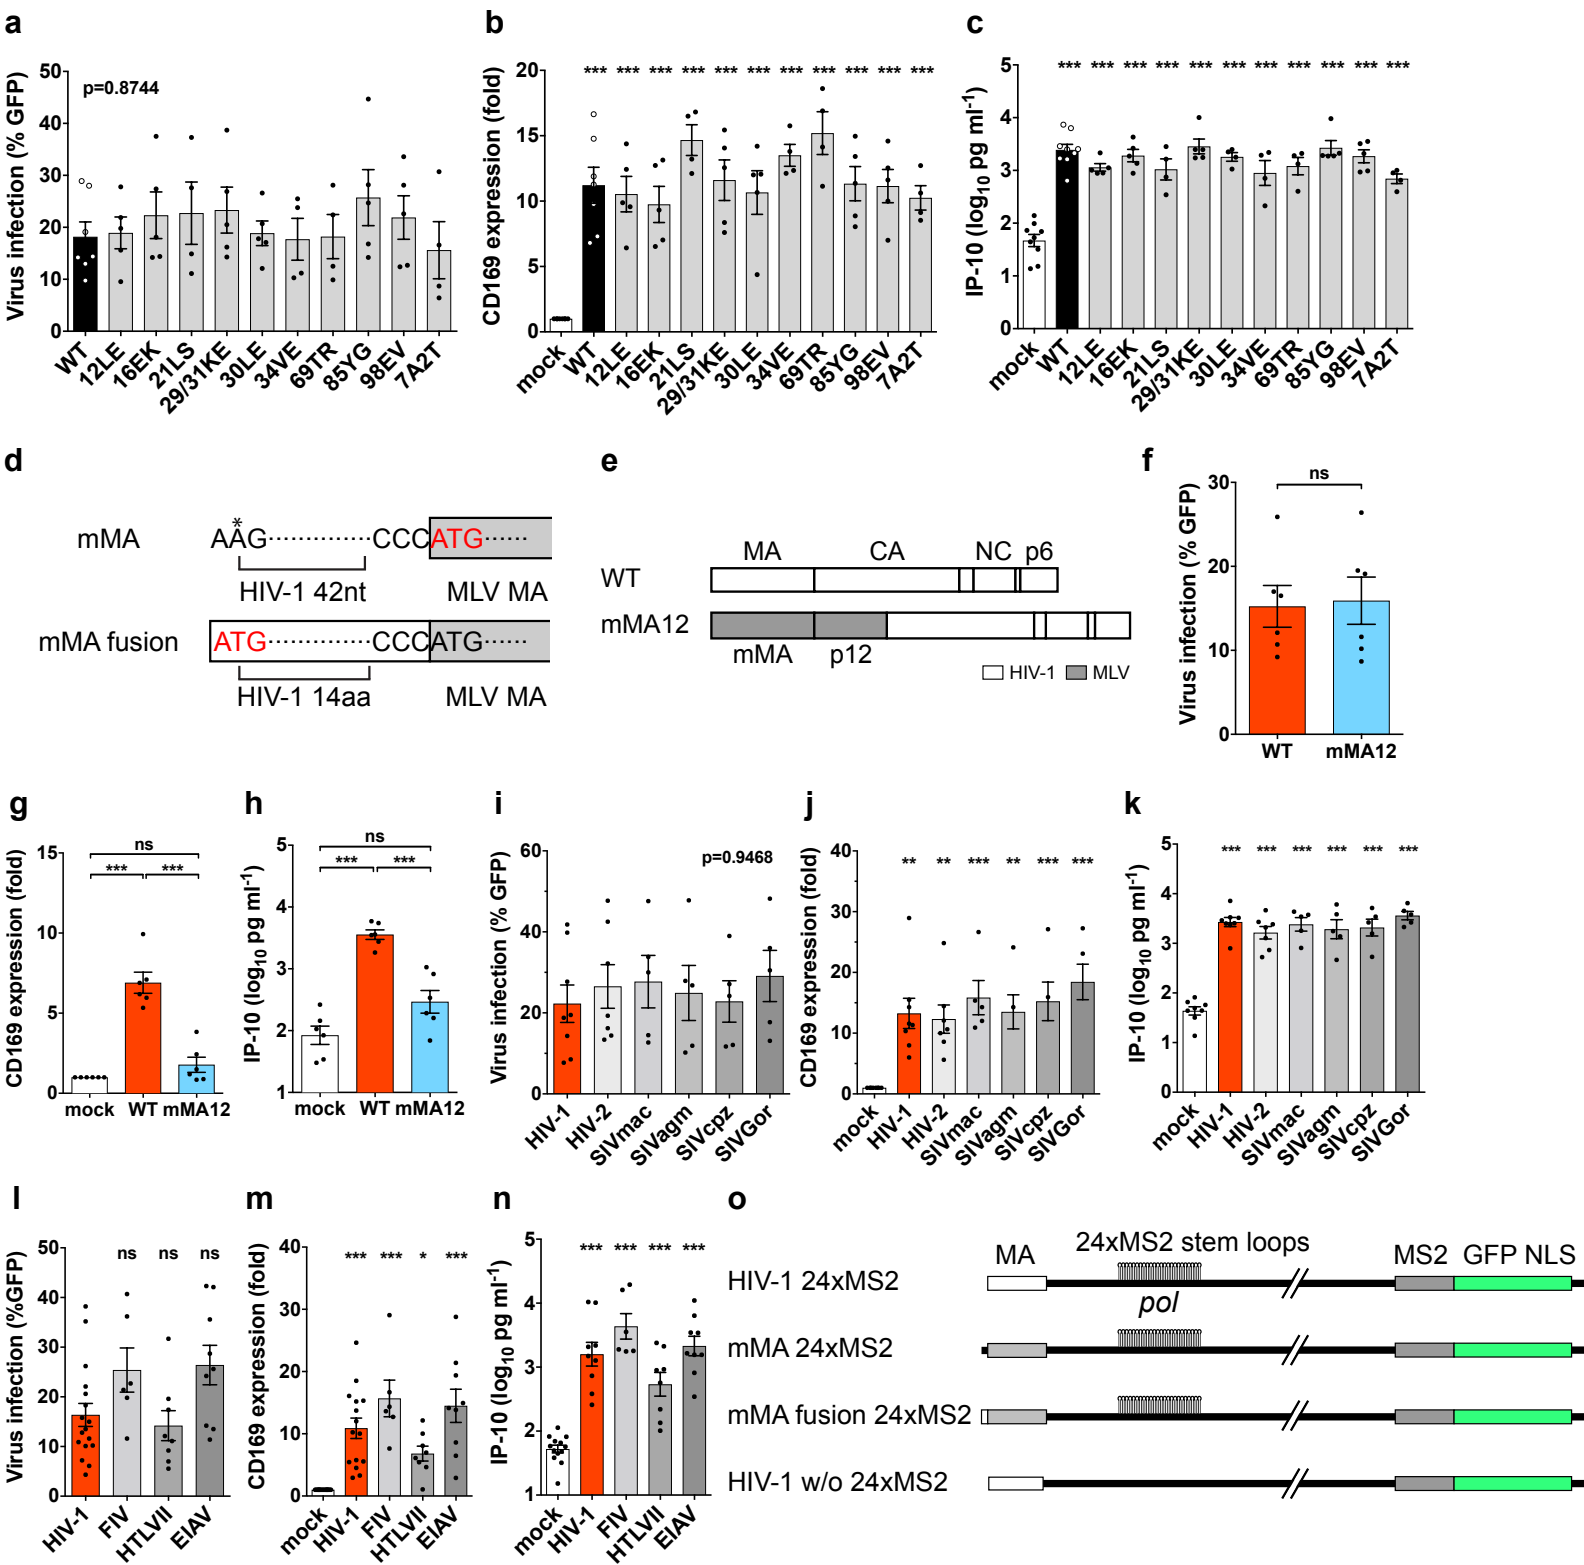

**Supplementary Figure 4. Membrane targeting of viral icRNA is required for MDM activation.**

**a-c**, Virus infection (GFP) (**a**), CD169 expression normalized to mock (**b**), and IP-10 production (**c**) in MDMs transduced with WT or indicated MA mutants lacking various MA functions (**Supplementary Table 1**) (6 dpi). **d**, Schematic demonstration of HIV-1 mutants encoding MLV MA. Both mutants contain HIV-1 MA sequences (42 nt) prior to the start codon for MLV MA. However, one (mMA) does not lead to expression of any of HIV-1 MA amino acids (aa) due to inactivation of the HIV-1 MA start codon (\*), while the other (mMA-fusion) results in translation of first 14 aa of HIV-1 MA in frame with the MLV MA protein. **e**, Schematic demonstration of MLV/HIV-1 chimera, mMA12. **f-h**, Viral gene expression (GFP) (**f**), normalized CD169 expression (**g**), and IP-10 production (**h**) in MDMs infected (at MOI of 2) with WT or mMA12 (6 dpi). **i-k**, Viral gene expression (GFP) (**i**), CD169 expression normalized to mock (**j**), and IP-10 production (**k**) in MDMs transduced with WT or indicated chimeric viruses encoding MA from various primate lentiviruses (6 dpi). **l-n**, Viral gene expression (GFP) (**l**), CD169 expression normalized to mock (**m**), and IP-10 production (**n**) in MDMs transduced with WT or indicated chimeric viruses encoding MA from various lentiviruses and retroviruses (6 dpi). **o**, Schematic demonstration of HIV-1 mutants containing 24xMS2 stem loops in the *pol* orf and MS2-GFP-NLS fusion protein in place of the *nef* orf. The data shown are the means  $\pm$  SEM and each symbol represents data obtained from cells derived from an independent donor. Two-tailed p values were calculated using one-way ANOVA followed by the Tukey-Kramer post-test (**g, h**) or the Dunnett's post-test (**b, c, j, k, l, m, n**), or a paired t-test (**f**); \*,  $p < 0.05$ , \*\*,  $p < 0.01$ , \*\*\*,  $p < 0.001$ , ns: not significant.

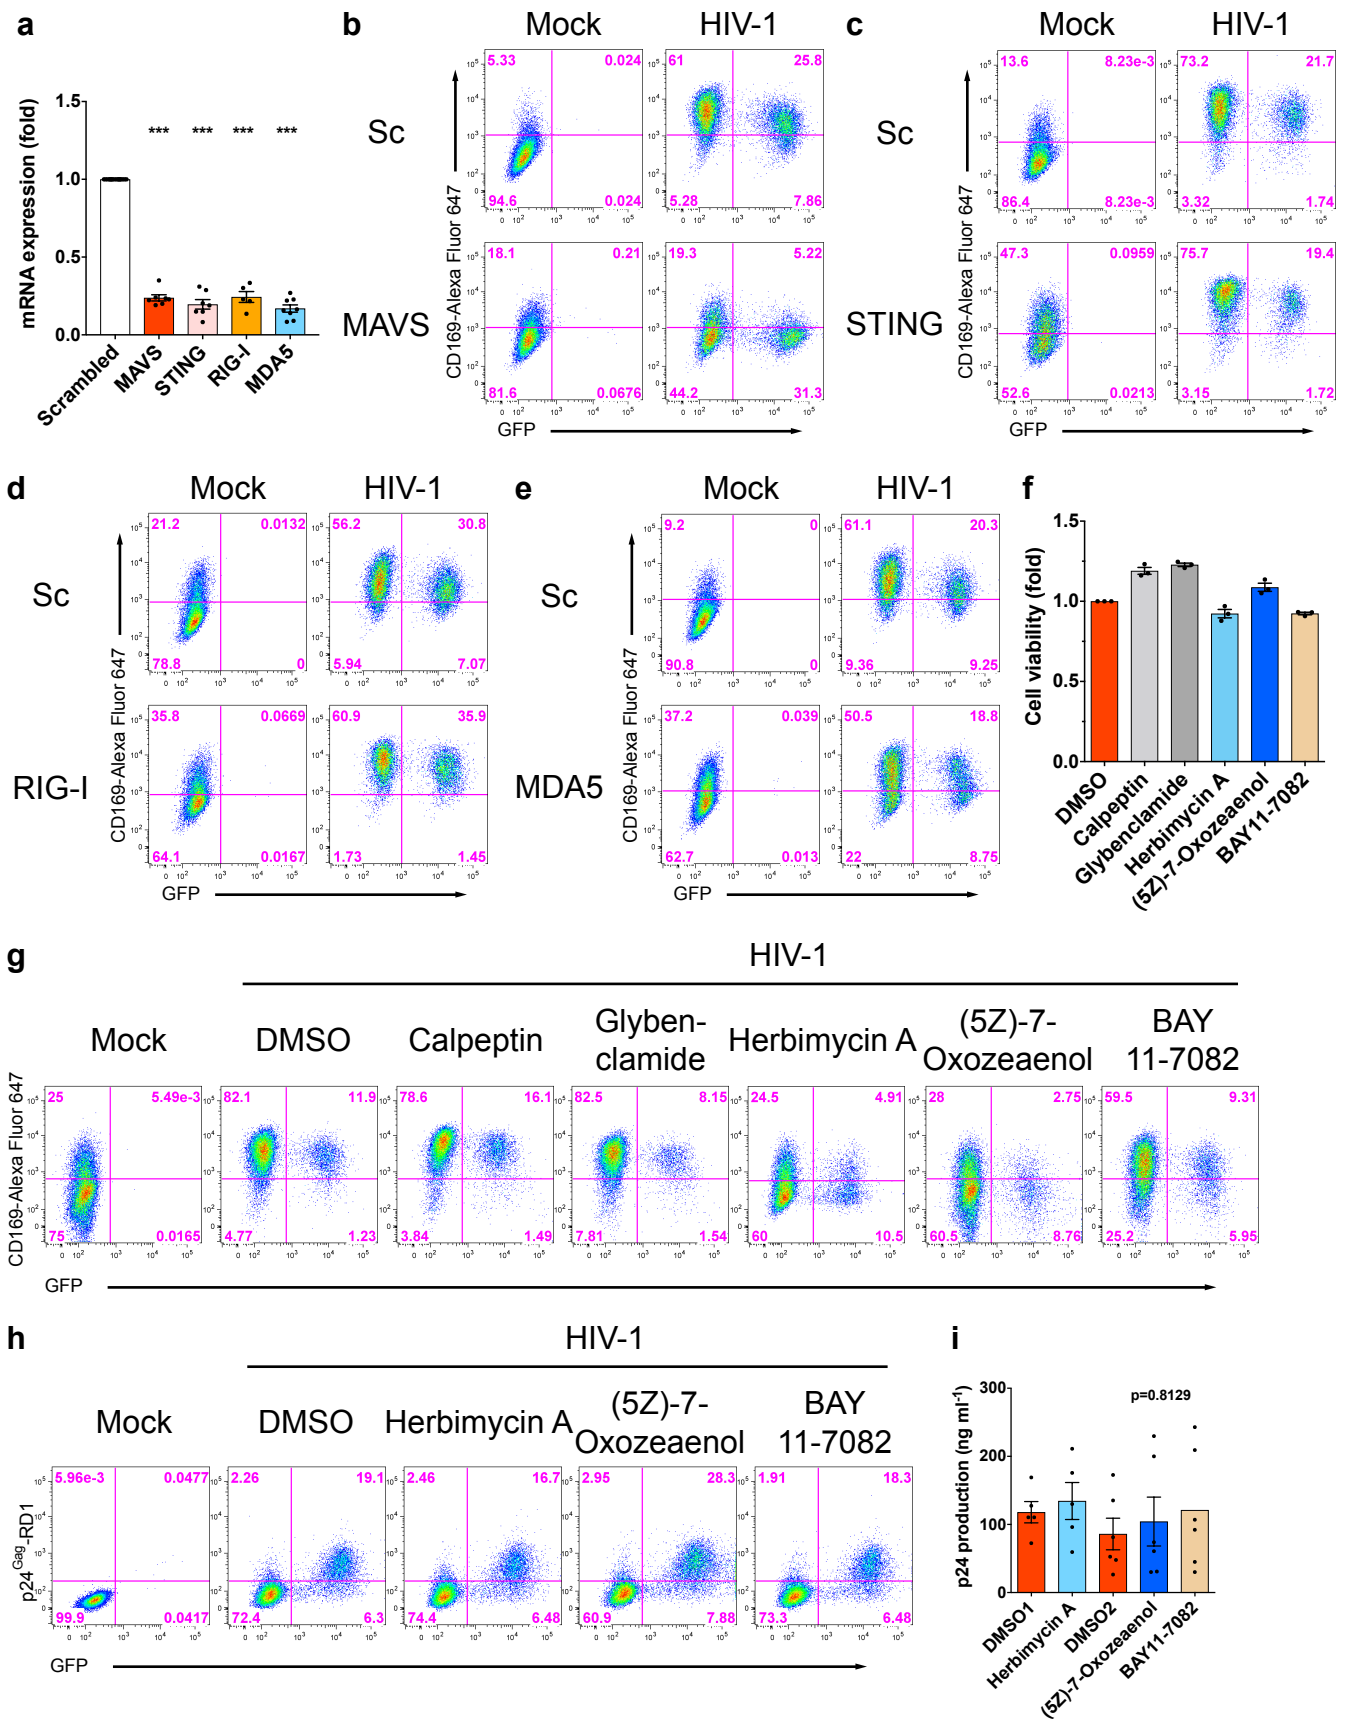

**Supplementary Figure 5. MDM immune activation is initiated via a MAVS dependent pathway.**

**a**, MDMs were transduced with lentiviral vectors expressing shRNA against indicated genes and mRNA levels of the target genes were quantitated with qRT-PCR. Each mRNA level was normalized to that of GAPDH and then normalized to that of scrambled-shRNA-transduced MDMs. **b**, **c**, Representative flow cytometry profiles of CD169 expression in MDMs transduced with either scrambled shRNA (Sc), shRNA against MAVS (**b**) or STING (**c**) and infected with LaiΔenvGFP/G (6 dpi). **d**, **e**, Representative CD169 expression profiles of MDMs transduced with scrambled shRNA (Sc), shRNA against RIG-I (**d**) or MDA5 (**e**) and infected with LaiΔenvGFP/G (6 dpi). **f**, MDMs were cultured for 6 days in the presence of the indicated inhibitors and cell viability was measured by MTT assay. The values were normalized to that of untreated (DMSO). **g**, Representative CD169 expression profiles of MDMs infected with HIV-1 in the presence of indicated inhibitors for 6 days. **h**, Representative flow cytometry profiles of MDMs infected with HIV-1 (GFP in place of *nef*) in the presence or absence (DMSO) of drugs showing intracellular p24<sup>Gag</sup> (y-axis) and GFP (x-axis) (6 dpi). **i**, MDMs were infected with HIV-1 and cultured with indicated drugs. The p24<sup>Gag</sup> contents in the supernatants harvested 6 dpi was measured. DMSO1: 0.1% DMSO, DMSO2: 0.01% DMSO. The data shown are the means ± SEM and each symbol represents data obtained from cells derived from an independent donor. Two-tailed p values were calculated using one-way ANOVA followed by the Dunnett's post-test. \*\*\*:  $p < 0.001$ .

**a**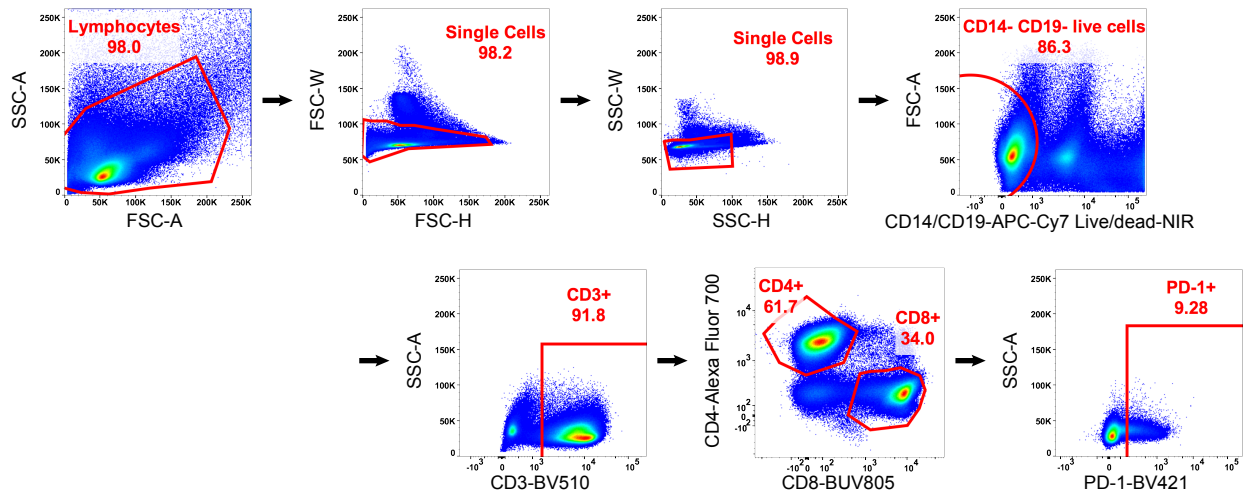**b**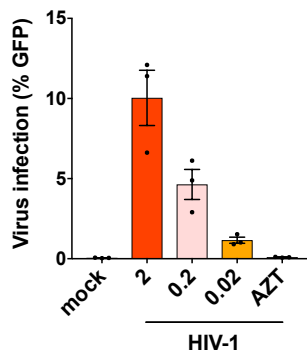**c**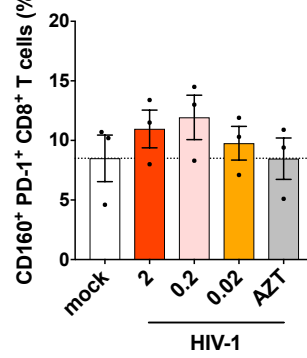**d**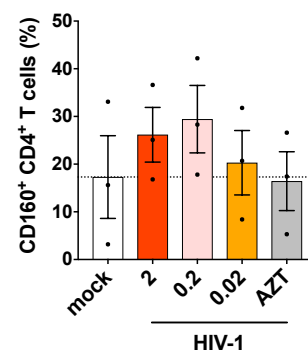

**Supplementary Figure 6. HIV-1-infection-induced MDM activation results in expression of IRs on T cells and their functional impairment.** **a**, Representative flow cytometry profiles to show the gating strategy for inhibitory receptor expression profiling and intracellular cytokine staining. **b**, MDMs were infected at various MOIs or in the presence of AZT, and GFP expression was measured with flow cytometry 6 days post infection. **c**, **d**, MDMs infected with HIV-1 at different MOIs were co-cultured with PBMCs, and the percentage of CD160<sup>+</sup> PD-1<sup>+</sup> CD8<sup>+</sup> T cells (**c**) and CD160<sup>+</sup> CD4<sup>+</sup> T cells (**d**) on day 5 post initiation of co-culture was quantitated by flow cytometry. The dotted lines indicate the background levels (mock).

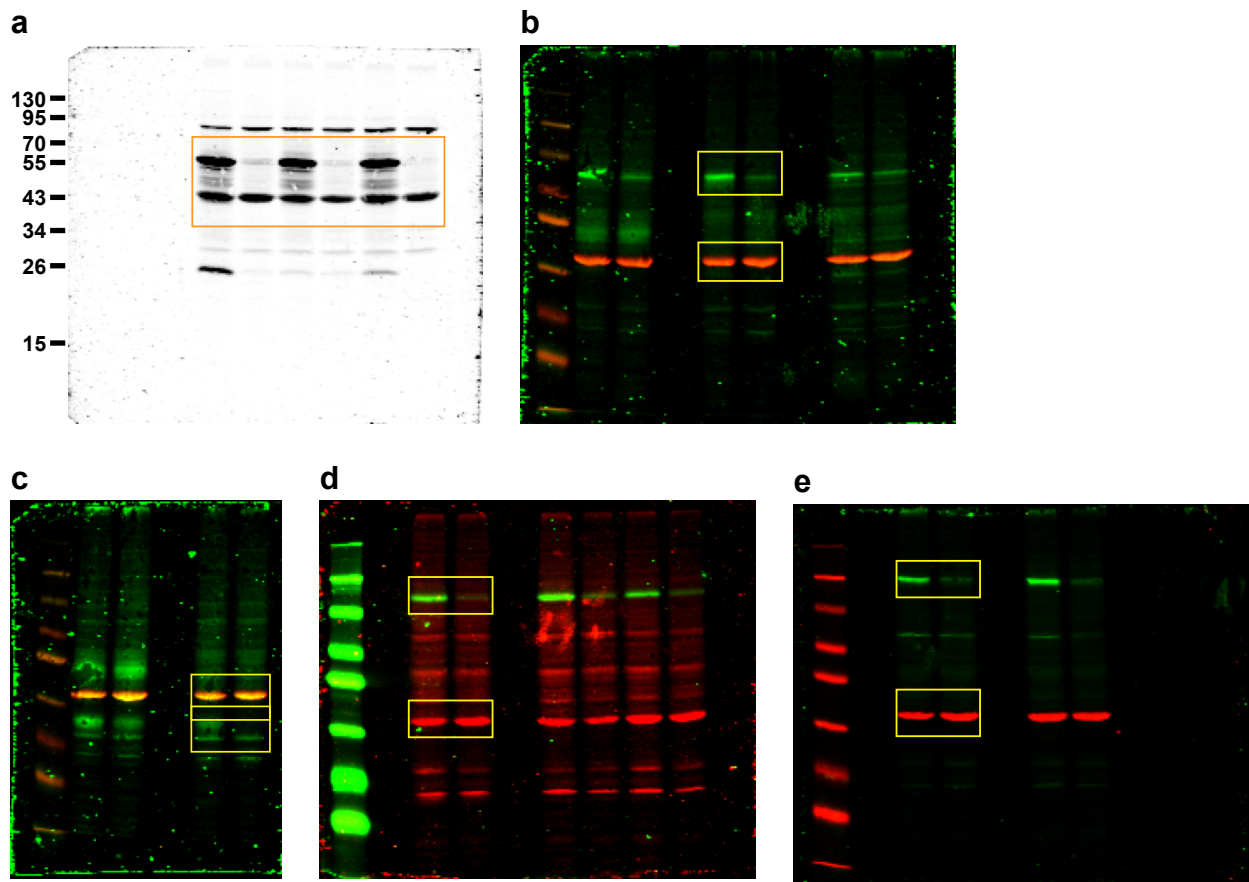

**Supplementary Figure 7. Uncropped immunoblot images.**

Uncropped immunoblot images for (a) Figure 3a, (b) Figure 5a, MAVS, (c) Figure 5a, STING, (d) Figure 5f, RIG-I and (e) Figure 5f, MDA5. Orange and yellow rectangles indicate where images were cropped.



## Supplementary Table 1

| Plasmid        |   | Primer                                                            | Ref. |
|----------------|---|-------------------------------------------------------------------|------|
| M10            | F | GCCTCTTCAGCTACCACCGGATCTGAGACTTACTCTTGATTGTAAC                    | 1    |
|                | R | GTTACAATCAAGAGTAAGTCTCAGATCCGGTGGTAGCTGAAGAGGC                    |      |
| CTE            | F | TTTTTGGATCCACTATAGGGCGAATTGAATTTAGCG                              | 2    |
|                | R | GGATAACAAT TTCACACAGG AACAGCTAT GAC                               |      |
| CTE AS         | F | TTTTTGGTAGCACTATAGGGCGAATTGAATTTAGCG                              | 2    |
|                | R | TTTTTGGATCCCAGAATTAACCCTCACTAAAGGGAC                              |      |
| ΔMA            | F | TTTAAAGCTA GCCAGGTCAG CCAAAATTAC CCTATA                           |      |
|                | R | AAATTTGCTA GCTCTCGCAC CCATCTCTCT CTT                              |      |
| ATG*           | F | GCTAGAAGGAGAGAGAAGGGTGCAGAGAGCGT                                  |      |
|                | R | ACGCTCTCGCACCCCTTCTCTCCTTCTAGC                                    |      |
| HIV-1 + AatII  | F | AAAAAAGACGTCAGCCAAAATTACCCTATAGTGCAGAAC                           |      |
|                | R | CTGGGTTTCGATTTTGGACC                                              |      |
| HIV-1-vec      | F | AGGCTAGAAGGAGAGCCATGGGTGCGAGAGCG                                  |      |
|                | R | CGCTCTCGCACCCATGGCTCTCCTTCTAGCCT                                  |      |
| HIV-1-vec-plus | F | AGAGGAGCTC TCTCGACG                                               | 3    |
|                | R | AAAAAACCATGGGATCTAATTCTCCCCGCTTAATAC                              |      |
| HIV-1 MA       | F | AAAAACCATGGGTGCGAGAGCGTC                                          |      |
|                | R | AAAACCGGTCTTCCGACGTCGTAATTTGGCTGACCTGGC                           |      |
| HIV-2 MA       | F | AAAAACCATGGGCGCGAGAACTC                                           |      |
|                | R | AAAACCGGTCTTCCGACGTCGTAATTTCTCCCTTCTCGC                           |      |
| MLV MA         | F | AAAAACCATGGGCCAGACTGTTACC                                         | 4    |
|                | R | AAAACCGGTCTTCCGACGTCATAAAGGGAGGATCGAGGCG                          |      |
| SIVmac MA      | F | AAAAACCATGGGCGTGAGAACTC                                           |      |
|                | R | AAAACCGGTCTTCCGACGTCGTAATTTCTCCTCTGCC                             |      |
| SIVagm MA      | F | AAAAACCATGGGTGCGAGTAACTCAG                                        |      |
|                | R | AAAACCGGTCTTCCGACGTCGTAATTTGTGATCCACCAC                           |      |
| SIVcpz MA      | F | AAAAACCATGGGTGCGAGAGC                                             |      |
|                | R | AAACCGGTCTTCCGACGTCGTAATCTACTCCGCTAGG                             |      |
| SIVgor MA      | F | AAAAACCATGGGTGCGAGAGC                                             |      |
|                | R | AAACCGGTCTTCCGACGTCATAGTTCTGACTTGTTCAGG                           |      |
| FIV MA         | F | AAAAACCATGGGAATGGACAGGG                                           |      |
|                | R | AAAAAAGACGTCATATGCCTGTGGAGGGCCTTC                                 |      |
| HTLVII MA      | F | AAAAACCATGGGACAAATCCACGGG                                         | 5    |
|                | R | AAAAAAGACGTCGAAGCATTGCGTGGTGG                                     |      |
| EIAV MA        | F | AAAAACCATGGGAGACCCTTTGACATG                                       | 6    |
|                | R | AAAAAAGACGTCATATTCTTCCAGAGGGCTCAGACTG                             |      |
| TagRFP         | F | AAAAACCATGGTGTCTAAGGGCGAAGAGC                                     |      |
|                | R | AAAAAAGACGTCTCAATTAAGTTTGTGCCCCAGTTTGC                            |      |
| 12LE           | F | GTATTAAGCGGGGAGAAGAAGATCGATGGGAAAAAATTCCG                         | 7    |
|                | R | CGAATTTTTTCCCATCGATCTTCTTCTCCCCGCTTAATAC                          |      |
| 16EK           | F | GGGGAGAATTAGATCGATGGAAGAAAATTCGGTTAAGGCC                          | 8    |
|                | R | GGCCTTAACCGAATTTTCTTCCATCGATCTAATTCTCCCC                          |      |
| 21LS           | F | GATGGGAAAAAATTCGGTCAAGGCCAGGGGGAAAG                               | 9    |
|                | R | CTTCCCCCTGGCCTTGACCGAATTTTTTCCCATC                                |      |
| 29/31KE        | F | GGGGGAAAGA AAAAATATGA ATTAGAACAT ATAGTATGGG C                     | 10   |
|                | R | GCCATACTA TATGTTCTAA TTCATATTTT TTCTTTCCCC C                      |      |
| 30LE           | F | GGCCAGGGGGAAAGAAAAAATATAAAGAAAAACATATAGTATGGGC                    | 7    |
|                | R | GCCATACTATATGTTTTTCTTTATATTTTTTCTTTCCCCCTGGCC                     |      |
| 34VE           | F | AAATTAACATATAGAATGGGCAAGCAGGGAGCTAGAAC                            | 11   |
|                | R | GTTCTAGCTCCCTGCTTGCCCATTTCTATATGTTTTAATTT                         |      |
| 69TR           | F | CTACAACCATCCCTTCAGAGAGGATCAGAAGAAGCTTAG                           | 12   |
|                | R | CTAAGTTCTTCTGATCCTCTCTGAAGGGATGGTTGTAG                            |      |
| 85YG           | F | ATACATGCAACCCTCGGTTGTGTGCATCAAAGGATAG                             | 13   |
|                | R | CTATCCTTTGATGCACACAACCGAGGGTTGCTACTGTAT                           |      |
| 98EV           | F | GATAGAGATAAAAGACACCAAGGTTGCTTTAGACAAGATAGAGG                      | 12   |
|                | R | CCTCTATCTTGTCTAAAGCAACCTTGGTGTCTTTTATCTCTATC                      |      |
| 7A2T           | F | GTTAGCGCCAGGGGAGCGGCAGCATATACATTAACACATATAGTATGGGCAAGCAGGGAGC     | 14   |
|                | R | CCGCTCCCCCTGGCGCTAACGCAATTGCTTCCCATGCATCTAATTCTCCCCGCTTAATACTGACG |      |
| MS2-GFP 5'     | F | TTTTTCCATGGCTTCTAACTTTACTCAGTTCGTTT                               | 15   |
|                | R | CTCACCATGGTGGCGACCGGTGGTCCGCGTAGATGCCG                            |      |
| MS2-GFP 3'     | F | TTCACCGGTGCGCCACC                                                 | 15   |
|                | R | TTTTTCTCGAGTTATACCTTTCTTCTTTTTTGGCTTG                             |      |

## Supplementary Table 2

| Gene         | Sequence              | Ref.                   |
|--------------|-----------------------|------------------------|
| <b>MAVS</b>  | ATGTGGATGTTGTAGAGATTC | Sigma (TRCN0000236031) |
| <b>STING</b> | GCCCGGATTCGAACTTACAAT | Sigma (TRCN0000163296) |
| <b>RIG-I</b> | CCAGAATTATCCCAACCGATA | Sigma (TRCN0000153712) |
| <b>MDA5</b>  | CCAACAAAGAAGCAGTGTATA | Sigma (TRCN0000050849) |

## Supplementary Table 3

| Gene        | Forward                 | Reverse                   |
|-------------|-------------------------|---------------------------|
| HIV-1 RNA   | TGTGTGCCCGTCTGTTGTGT    | CTCTCCTTCTAGCCTCCGCT      |
| GAPDH       | CAAGATCATCAGCAATGCCT    | AGGGATGATGTTCTGGAGAG      |
| IFN $\beta$ | ATTCTAACTGCAACCTTTTCG   | GTTGTAGCTCATGGAAAGAG      |
| CD169       | GGCTGTTACGATGGTTTATGATG | AATCAAAGGCATCATTTTAGGGATA |
| IP-10       | AAAGCAGTTAGCAAGGAAAG    | TCATTGGTCACCTTTTAGTG      |
| ISG15       | TCCTGGTGAGGAATAACAAGGG  | GTCAGCCAGAACAGGTCGTC      |
| ISG54       | GGTCTCTTCAGCATTATTGGTG  | TGCCGTAGGCTGCTCTCCA       |
| ISG56       | TAGCCAACATGTCCTCACAGAC  | TCTTCTACCACTGGTTTCATGC    |
| Viperin     | TGGGTGCTTACACCTGCTG     | GAAGTGATAGTTGACGCTGGTT    |
| Mx1         | GTTTCCGAAGTGGACATCGCA   | CTGCACAGGTTGTTCTCAGC      |
| MAVS        | GTACCCGAGTCTCGTTTC      | GCAGAATCTCTACAACATCC      |
| STING       | ACTGTGGGGTGCCTGATAAC    | TGGCAAACAAAGTCTGCAAG      |
| RIG-I       | ATCCCAGTGTATGAACAGCAG   | GCCTGTAACTCTATACCCATGTC   |
| MDA5        | GGCATGGAGAATAACTCATCAG  | CTCTTCATCTGAATCACTTCCC    |

## Supplementary References

- 1 Malim, M. H., Bohnlein, S., Hauber, J. & Cullen, B. R. Functional dissection of the HIV-1 Rev trans-activator--derivation of a trans-dominant repressor of Rev function. *Cell* **58**, 205-214 (1989).
- 2 Wodrich, H., Schambach, A. & Krausslich, H. G. Multiple copies of the Mason-Pfizer monkey virus constitutive RNA transport element lead to enhanced HIV-1 Gag expression in a context-dependent manner. *Nucleic acids research* **28**, 901-910 (2000).
- 3 Reed, M. *et al.* Chimeric human immunodeficiency virus type 1 containing murine leukemia virus matrix assembles in murine cells. *Journal of virology* **76**, 436-443 (2002).
- 4 Yamashita, M. & Emerman, M. Capsid is a dominant determinant of retrovirus infectivity in nondividing cells. *Journal of virology* **78**, 5670-5678, doi:10.1128/JVI.78.11.5670-5678.2004 (2004).
- 5 Shimotohno, K. *et al.* Complete nucleotide sequence of an infectious clone of human T-cell leukemia virus type II: an open reading frame for the protease gene. *Proceedings of the National Academy of Sciences of the United States of America* **82**, 3101-3105 (1985).
- 6 Patel, M., Giddings, A. M., Sechelski, J. & Olsen, J. C. High efficiency gene transfer to airways of mice using influenza hemagglutinin pseudotyped lentiviral vectors. *The journal of gene medicine* **15**, 51-62, doi:10.1002/jgm.2695 (2013).
- 7 Freed, E. O. & Martin, M. A. Virion incorporation of envelope glycoproteins with long but not short cytoplasmic tails is blocked by specific, single amino acid substitutions in the human immunodeficiency virus type 1 matrix. *Journal of virology* **69**, 1984-1989 (1995).
- 8 Joshi, A., Ablan, S. D., Soheilian, F., Nagashima, K. & Freed, E. O. Evidence that productive human immunodeficiency virus type 1 assembly can occur in an intracellular compartment. *Journal of virology* **83**, 5375-5387, doi:10.1128/JVI.00109-09 (2009).
- 9 Sherer, N. M., Swanson, C. M., Papaioannou, S. & Malim, M. H. Matrix mediates the functional link between human immunodeficiency virus type 1 RNA nuclear export elements and the assembly competency of Gag in murine cells. *Journal of virology* **83**, 8525-8535, doi:10.1128/JVI.00699-09 (2009).
- 10 Ono, A., Orenstein, J. M. & Freed, E. O. Role of the Gag matrix domain in targeting human immunodeficiency virus type 1 assembly. *Journal of virology* **74**, 2855-2866 (2000).
- 11 Freed, E. O. & Martin, M. A. Domains of the human immunodeficiency virus type 1 matrix and gp41 cytoplasmic tail required for envelope incorporation into virions. *Journal of virology* **70**, 341-351 (1996).
- 12 Tedbury, P. R., Ablan, S. D. & Freed, E. O. Global rescue of defects in HIV-1 envelope glycoprotein incorporation: implications for matrix structure. *PLoS pathogens* **9**, e1003739, doi:10.1371/journal.ppat.1003739 (2013).
- 13 Freed, E. O., Orenstein, J. M., Buckler-White, A. J. & Martin, M. A. Single amino acid changes in the human immunodeficiency virus type 1 matrix protein block virus particle production. *Journal of virology* **68**, 5311-5320 (1994).
- 14 Chukkapalli, V., Oh, S. J. & Ono, A. Opposing mechanisms involving RNA and lipids regulate HIV-1 Gag membrane binding through the highly basic region of the matrix domain. *Proceedings of the National Academy of Sciences of the United States of America* **107**, 1600-1605, doi:10.1073/pnas.0908661107 (2010).
- 15 Fusco, D. *et al.* Single mRNA molecules demonstrate probabilistic movement in living mammalian cells. *Current biology : CB* **13**, 161-167 (2003).
